## Sequence analysis

# PingPongPro: a tool for the detection of piRNA-mediated transposon-silencing in small RNA-Seq data

Sebastian Uhrig<sup>1,\*†</sup> and Holger Klein<sup>1,2</sup>

<sup>1</sup>Bioinformatics Core Facility, Institute of Molecular Biology, 55128 Mainz, Germany and <sup>2</sup>Computational Biology Group, Target Discovery Research, Boehringer Ingelheim Pharma GmbH & Co. KG, 88400 Biberach an der Riß, Deutschland

\*To whom correspondence should be addressed.

†Present address: Applied Bioinformatics, German Cancer Research Center (DKFZ), 69120 Heidelberg, Germany

Associate Editor: Alfonso Valencia

Received on October 3, 2017; revised on May 28, 2018; editorial decision on July 3, 2018; accepted on July 4, 2018

## Abstract

**Summary:** *Piwi*-interacting RNAs (piRNAs) are a class of small non-coding RNAs which guide endonucleases to mRNAs of actively transcribed transposons in order to prevent their translation. The resulting mRNA fragments induce a positive feedback loop (the ‘ping-pong cycle’), which reinforces piRNA production and hence the transposon-silencing effect. PingPongPro is a command-line tool to scan small RNA-Seq data for signs of ping-pong cycle activity. It implements a novel algorithm that combines empirical probabilities in a multi-factor model to accurately identify transposons which are suppressed through the ping-pong cycle.

**Availability and implementation:** Source code, a user manual, and binaries for Microsoft Windows and Linux are available at <https://github.com/suhrig/pingpongpro> under the GPLv3 license.

**Contact:** [s.uhrig@dkfz.de](mailto:s.uhrig@dkfz.de)

**Supplementary information:** [Supplementary data](#) are available at *Bioinformatics* online.

## 1 Introduction

The destructive activity of transposons is suppressed by *Piwi*-interacting RNAs (piRNAs), a class of small non-coding RNAs, predominantly active in the germline. They form complexes with *Piwi*-like endonucleases and guide them to mRNA of actively transcribed transposons by means of complementary base-pairing. The endonucleases degrade the mRNA molecules and thus defuse their harmful potential. The fragments of the degraded mRNA induce the production of even more piRNAs, thus accelerating the degradation of transposon mRNA. This feed-forward loop has been suggested by Brennecke *et al.* (2007) and Gunawardane *et al.* (2007), who coined the term ‘ping-pong cycle’ for the process.

Next-generation sequencing (NGS) of small RNA molecules gives insight into ping-pong cycle activity and the transposons suppressed by it. The cycle produces a characteristic pattern of how reads align to the reference genome: since the very nature of the cycle is to multiply piRNA molecules, an active cycle manifests as

many reads mapping to the same start coordinate forming a ‘stack’ of reads (Supplementary Fig. S1). Typically two stacks align to opposite strands—one represents fragments of transposon mRNA; the other represents their complementary piRNAs. The endonucleases involved in the ping-pong cycle cleave RNA molecules with an offset of 10 nt, such that the stacks overlap by the first 10 nt from the 5’ end. Such pairs of stacks (‘ping-pong signatures’) are hallmarks of piRNA-mediated transposon-silencing and form the basis for the analysis of small RNA-Seq data for signs of ping-pong cycle activity.

## 2 Algorithm

Naïve algorithms for the detection of ping-pong cycle activity rely solely on read counts (Antoniewski, 2014; Han *et al.*, 2015; Li *et al.*, 2009). They count the number of reads within the region of a transposon overlapping by 10 nt and compare this number against the amount of reads which overlap by arbitrary lengths. If the read

count of the former is significantly higher, the transposon is assumed to be suppressed by the ping-pong cycle. Statistical significance is assessed by means of a Z-test.

PingPongPro employs a similar algorithm (Supplementary Fig. S2), but instead of using raw read counts, it uses weighted counts. Each read is assigned a weight equal to the empirical probability that the read is ping-pong-derived. The probabilities are estimated based on how well the read satisfies the characteristics of a true ping-pong signature:

- Reads of true ping-pong signatures form stacks, which are aligned at their 5' ends and which overlap with a stack on the opposite strand by exactly 10 nt.
- The stack is considerably higher than other stacks in the close vicinity, such that the height cannot be explained by the local coverage.
- Often, one of the stacks has adenine at the 10th position.

In the first step PingPongPro examines overlaps of arbitrary lengths ( $\neq 10$  nt) and calculates empirical probabilities  $p$  that a read satisfies the above characteristics by chance, assuming that the number of signatures  $s$  with a given set of characteristics  $C$  follows a normal distribution  $\varphi_C$ . Next, the program uses these probabilities to assign weights to reads:

$$w(r) = r \cdot [1 - p] = r \cdot \left[ 1 - \int \min(i/s, 1) \cdot \varphi_C(i) di \right] \quad (1)$$

Finally, analogous to the naïve algorithm Z-score statistics are calculated from the weighted sum of reads with an overlap of 10 nt  $w(r_{10})$  and the weighted sum of reads with other overlaps  $w(r_{\neq 10})$ :

$$\text{z-score} = \frac{w(r_{10}) - \text{mean}(w(r_{\neq 10}))}{\sqrt{\text{var}(w(r_{\neq 10})) / n}} \quad (2)$$

Supplementary Table S2 and Figure S5 demonstrate the superiority of PingPongPro over the naïve algorithm. On average PingPongPro detects 13% more regions with ping-pong cycle activity without compromising specificity and increases the area under the curve of the receiver-operating characteristic by 0.12.

### 3 Implementation

PingPongPro was written in C++ and builds on the NGS analysis library SeqAn (Döring *et al.*, 2008). Source code and readily usable binaries are available for Microsoft Windows and Linux.

Accepted input formats for sequencing data are the SAM and BAM file formats. The tool can be supplied with a list of annotated transposons in various formats (GFF, GTF, BED, CSV, TSV). These transposons are checked for ping-pong cycle activity.

PingPongPro outputs all of its results in tab-separated text files, which are easily imported into common statistics/spreadsheet programs. Moreover, it generates bedGraph files for visualization of detected ping-pong signatures and suppressed transposons in popular genome browsers (Fig. 1).

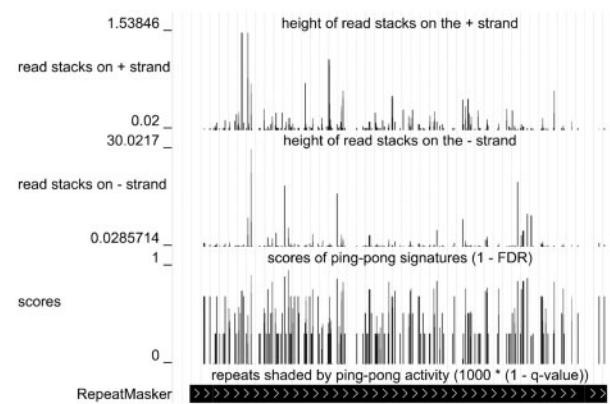

**Fig. 1.** Screenshot of the UCSC genome browser showing the transposon *BLOOD\_I-int* of *Drosophila melanogaster* (chr2L: 1220184-1227592) covered with ping-pong signatures (data from Li *et al.*, 2009, SRA accession number SRR010960)

### 4 Conclusion

PingPongPro is a software tool to detect ping-pong cycle activity in small RNA-Seq data. It locates sites of piRNA-mediated cleavage and identifies transposons suppressed through the ping-pong cycle. PingPongPro's algorithm enhances established methods for the detection of ping-pong cycle activity. By taking additional covariates into account and auto-tuning its parameters to the data, it achieves more reliable predictions than previous approaches. Cross-platform compatibility, support of standard input file formats, flexible output file formats, and a resource-efficient implementation enable researchers to adopt the software with ease.

### Acknowledgements

We thank the bioinformatics core facility and the research group of René Ketting at the Institute of Molecular Biology Mainz for their input and data.

*Conflict of Interest:* none declared.

### References

- Antoniowski, C. (2014) Computing siRNA and piRNA overlap signatures. *Methods Mol. Biol.*, **1173**, 135–146.
- Brennecke, J. *et al.* (2007) Discrete small RNA-generating loci as master regulators of transposon activity in *Drosophila*. *Cell*, **128**, 1089–1103.
- Döring, A. *et al.* (2008) SeqAn an efficient, generic C++ library for sequence analysis. *BMC Bioinformatics*, **9**, 11.
- Gunawardane, L.S. *et al.* (2007) A slicer-mediated mechanism for repeat-associated siRNA 5' end formation in *Drosophila*. *Science*, **315**, 1587–1590.
- Han, B.W. *et al.* (2015) piPipes: a set of pipelines for piRNA and transposon analysis via small RNA-seq, RNA-seq, degradome- and CAGE-seq, ChIP-seq and genomic DNA sequencing. *Bioinformatics*, **31**, 593–595.
- Li, C. *et al.* (2009) Without Argonaute3, Aubergine-bound piRNAs collapse but Piwi-bound piRNAs persist. *Cell*, **137**, 509–521.
